# Supplementary material
Source: publisher site journal article supplement (https://www.spandidos-publications.com/7315/downloadSupplementary)
Supplement: Supplementary file 1 [file downloadSupplementary]

Table SI. SQ of TC-HT in A549 cells treated with varying concentrations of Erl and/or TC-HT.

| Treatment group    | Cell viability (% of control) | Inhibition rate | SQ value |
|--------------------|-------------------------------|-----------------|----------|
| TC-HT              | 80.32±6.42                    | 19.68           |          |
| 0.5 µM Erl         | 77.14±3.90                    | 22.86           |          |
| TC-HT + 0.5 µM Erl | 49.09±2.25                    | 50.91           | 1.20     |
| 2 µM Erl           | 69.90±1.13                    | 30.10           |          |
| TC-HT + 2 µM Erl   | 43.59±3.47                    | 56.41           | 1.13     |
| 8 µM Erl           | 56.83±0.95                    | 43.17           |          |
| TC-HT + 8 µM Erl   | 34.84±1.78                    | 65.16           | 1.04     |
| 10 µM Erl          | 47.74±1.25                    | 52.26           |          |
| TC-HT + 10 µM Erl  | 28.91±0.92                    | 71.09           | 0.99     |

SQ, synergy quotient; TC-HT, thermal cycling-hyperthermia; Erl, erlotinib.
